# Supplementary material for: Investigation of the Associations between Diet Quality and Health-Related Quality of Life in a Sample of Swedish Adolescents
Source: MDPI journal article supplement (doi:10.3390/nu14122489), 2022-06-15
Supplement: s1 [file s1]

## Supplementary material

**Table S1.** Correlation matrix between SHEIA15, RADDs and KS-10

| Variables | SHEIA15 | RADDs    | KS-10    |
|-----------|---------|----------|----------|
| SHEIA15   | 1       | 0.442 ** | 0.019    |
| RADDs     | 0.442** | 1        | 0.093 ** |
| KS-10     | 0.019   | 0.093 ** | 1        |

\*\* =  $p < 0.01$

**Table S2.** Mean intake for SHEIA15 components and associated reference values based on national recommendations and guidelines.

|                        | Mean intake/day           | Reference values/day |
|------------------------|---------------------------|----------------------|
|                        | Gram/10MJ(SD)             | Gram/10MJ            |
| Wholegrain             | 33.3(40.0)                | 75 <sup>a</sup>      |
|                        | Gram/MJ(SD)               | Gram/MJ              |
| Fibre                  | 2.08(0.73)                | 3.00 <sup>b</sup>    |
|                        | E%(SD)                    | E%                   |
| SFA                    | 13.2(3.40)                | <10 <sup>b</sup>     |
| MUFA                   | <b>13.3(3.54)</b>         | 10-20 <sup>b</sup>   |
| PUFA                   | 4.65(1.49)                | 5-10 <sup>b</sup>    |
| Added sugar            | 10.7(8.10)                | <10 <sup>b</sup>     |
|                        | Gram(SD)                  | Gram                 |
| Vegetables and fruit   | 208(175)                  | 500 <sup>c</sup>     |
| Fish and shellfish     | 20.5(59.6)                | 45 <sup>d</sup>      |
| Red and processed meat | 642.1(528.3) <sup>e</sup> | <500 <sup>b</sup>    |

Values meeting reference values shown in bold. Abbreviations: Swedish Healthy Eating index for Adolescents 2015 (SHEIA15), mega joule (MJ), standard deviation (SD), energy percent (E%), saturated-fatty acid (SFA), monounsaturated-fatty acid (MUFA) and poly-unsaturated fatty acid (PUFA)

<sup>a</sup> Intake based on nutrient density in (44)

<sup>b</sup> Based on the (3)

<sup>c</sup> Based on Swedish food-based dietary guidelines: (26)

<sup>d</sup> Based on Swedish food-based dietary guidelines: (26) and advice from (Brugård Konde)

<sup>e</sup> Red and processed meat intake per week
